# Supplementary material
Source: publisher figshare collection journal article supplement (https://rs.figshare.com/ndownloader/files/12440159)
Supplement: Supplementary file 1 [file 12440159]

## Sheet: Experiment 3
id	block	condition	sleep propensity (min^-1)
1	1	dark	0.32
1	2	green	0.140351
1	3	dark	0.115942
1	4	green	0.0824742
1	5	blue	0.0583942
1	6	red	0.163265
1	7	blue	0.275862
1	8	red	0.0761905
2	1	green	0.131148
2	2	green	0.380952
2	3	dark	0.380952
2	4	red	0.615385
2	5	dark	0.615385
2	6	red	0.380952
2	7	blue	0.615385
2	8	blue	0.32
3	1	green	0.380952
3	2	red	1.6
3	3	green	0.470588
3	4	red	0.888889
3	5	dark	0.888889
3	6	blue	0.888889
3	7	dark	0.888889
3	8	blue	0.380952
4	1	red	0.195122
4	2	red	0.275862
4	3	green	0.615385
4	4	blue	0.32
4	5	green	0.615385
4	6	blue	0.275862
4	7	dark	0.470588
4	8	dark	0.380952
5	1	red	0.888889
5	2	blue	0.380952
5	3	red	0.380952
5	4	blue	0.470588
5	5	green	0.380952
5	6	dark	0.470588
5	7	green	0.615385
5	8	dark	0.275862
6	1	blue	0.177778
6	2	blue	0.470588
6	3	red	0.103896
6	4	dark	0.470588
6	5	red	0.32
6	6	dark	0.32
6	7	green	0.115942
6	8	green	0.064
7	1	blue	0.380952
7	2	dark	0.177778
7	3	blue	0.275862
7	4	dark	0.195122
7	5	red	0.470588
7	6	green	0.242424
7	7	red	0.380952
7	8	green	NA
8	1	dark	0.242424
8	2	dark	0.177778
8	3	blue	0.0462428
8	4	green	0.0941176
8	5	blue	0.275862
8	6	green	0.0987654
8	7	red	0.0333333
8	8	red	0.0333333
9	1	dark	0.140351
9	2	green	0.216216
9	3	dark	0.470588
9	4	green	0.242424
9	5	blue	0.380952
9	6	red	0.470588
9	7	blue	0.242424
9	8	red	0.380952
10	1	green	0.140351
10	2	green	0.123077
10	3	dark	0.216216
10	4	red	0.275862
10	5	dark	0.32
10	6	red	0.195122
10	7	blue	0.177778
10	8	blue	0.470588
11	1	green	NA
11	2	red	NA
11	3	green	NA
11	4	red	0.615385
11	5	dark	0.177778
11	6	blue	0.32
11	7	dark	0.150943
11	8	blue	0.177778
12	1	red	0.470588
12	2	red	0.275862
12	3	green	0.275862
12	4	blue	0.380952
12	5	green	0.380952
12	6	blue	0.275862
12	7	dark	0.123077
12	8	dark	0.039801
13	1	red	0.163265
13	2	blue	0.177778
13	3	red	0.275862
13	4	blue	0.177778
13	5	green	0.131148
13	6	dark	NA
13	7	green	0.0987654
13	8	dark	0.0333333
14	1	blue	0.380952
14	2	blue	0.470588
14	3	red	0.380952
14	4	dark	0.32
14	5	red	0.888889
14	6	dark	0.615385
14	7	green	0.195122
14	8	green	0.115942
15	1	blue	0.0707965
15	2	dark	0.242424
15	3	blue	0.163265
15	4	dark	0.131148
15	5	red	0.470588
15	6	green	0.275862
15	7	red	0.177778
15	8	green	0.115942
16	1	dark	0.177778
16	2	dark	0.615385
16	3	blue	0.32
16	4	green	0.615385
16	5	blue	0.470588
16	6	green	0.470588
16	7	red	0.470588
16	8	red	0.380952

## Sheet: Participant characteristics
id	sex	age (y)
1	female	24
2	male	23
3	male	21
4	female	22
5	female	23
6	female	23
7	female	23
8	female	23
9	female	22
10	female	22
11	female	23
12	male	22
13	male	38
14	male	24
15	male	30
16	female	22
